# Supplementary material for: Optimal experimental design for efficient toxicity testing in microphysiological systems: A bone marrow application
Source: PubMed Central journal article supplement (PMC10103791; doi:10.3389/fphar.2023.1142581), 2023-03-31
Supplement: Presentation1.pdf [file Presentation1.pdf]

# Supplementary Figure 1

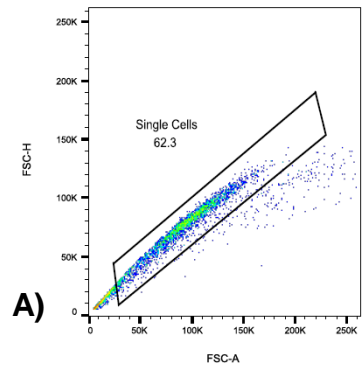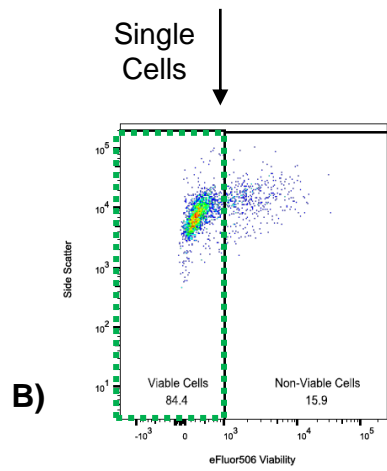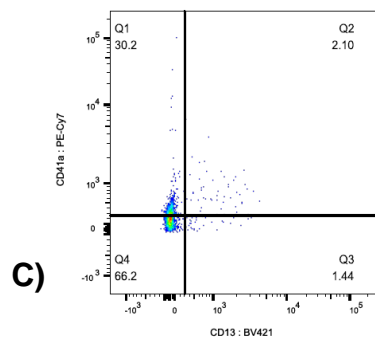

| Subset Name |                         |
|-------------|-------------------------|
| Q1:         | CD13-, CD41a+ Platelets |

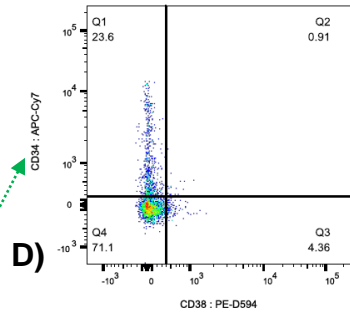

| Subset Name |                                     |
|-------------|-------------------------------------|
| Q1:         | CD38-, CD34+ Long Term HSCs         |
| Q2:         | CD38+, CD34+ Lineage Differentiated |

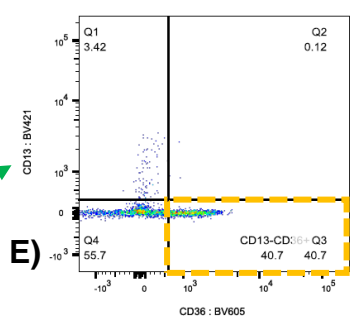

| Subset Name |                             |
|-------------|-----------------------------|
| Q2:         | CD36+ CD13+ Later Monocytes |
| Q3:         | CD36+, CD13- Erythroid      |

Erythroid Cells

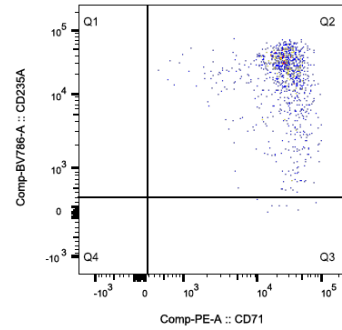

| Subset Name |                          |
|-------------|--------------------------|
| Q2:         | CD71+, CD235A+ Erythroid |
| Q3:         | CD71+, CD235A- Erythroid |

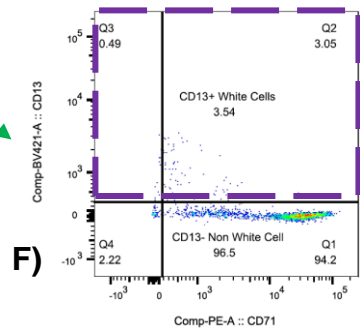

White Cells

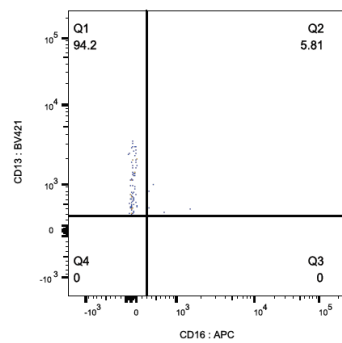

| Subset Name |                                 |
|-------------|---------------------------------|
| Q1:         | CD16-, CD13+ Early Myeloid      |
| Q2:         | CD16+, CD13+ Later Granulocytes |

Viable Cells

# Supplementary Figure 2

**A**

|              | Circuit |        |
|--------------|---------|--------|
|              | LHS     | RHS    |
| Treatment    | -       | -      |
| Circuit #    | 1       | 2      |
| Control Unit | 23      | 23     |
| Treatment    | Dose 2  | Dose 1 |
| Circuit #    | 3       | 4      |
| Control Unit | 23      | 23     |
| Treatment    | -       | -      |
| Circuit #    | 5       | 6      |
| Control Unit | 23      | 23     |
| Treatment    | T1 FMO  | T2 FMO |
| Circuit #    | 7       | 8      |
| Control Unit | 23      | 23     |
| Treatment    | Control | Dose 2 |
| Circuit #    | 9       | 10     |
| Control Unit | 24      | 24     |
| Treatment    | -       | -      |
| Circuit #    | 11      | 12     |
| Control Unit | 24      | 24     |

|              | Circuit |         |
|--------------|---------|---------|
|              | LHS     | RHS     |
| Treatment    | Control | Dose 1  |
| Circuit #    | 13      | 14      |
| Control Unit | 24      | 24      |
| Treatment    | -       | -       |
| Circuit #    | 15      | 16      |
| Control Unit | 24      | 24      |
| Treatment    | -       | -       |
| Circuit #    | 17      | 18      |
| Control Unit | 25      | 25      |
| Treatment    | Dose 2  | Control |
| Circuit #    | 19      | 20      |
| Control Unit | 25      | 25      |
| Treatment    | -       | -       |
| Circuit #    | 21      | 22      |
| Control Unit | 25      | 25      |
| Treatment    | Dose 1  | -       |
| Circuit #    | 23      | 24      |
| Control Unit | 25      | 25      |

|              | Circuit |         |
|--------------|---------|---------|
|              | LHS     | RHS     |
| Treatment    | -       | -       |
| Circuit #    | 25      | 26      |
| Control Unit | 26      | 26      |
| Treatment    | -       | -       |
| Circuit #    | 27      | 28      |
| Control Unit | 26      | 26      |
| Treatment    | Control | Dose 1  |
| Circuit #    | 29      | 30      |
| Control Unit | 26      | 26      |
| Treatment    | -       | -       |
| Circuit #    | 31      | 32      |
| Control Unit | 26      | 26      |
| Treatment    | Dose 2  | Control |
| Circuit #    | 33      | 34      |
| Control Unit | 27      | 27      |
| Treatment    | -       | -       |
| Circuit #    | 35      | 36      |
| Control Unit | 27      | 27      |

|              | Circuit |         |
|--------------|---------|---------|
|              | LHS     | RHS     |
| Treatment    | Dose 2  | T3 FMO  |
| Circuit #    | 37      | 38      |
| Control Unit | 27      | 27      |
| Treatment    | Dose 1  | Control |
| Circuit #    | 39      | 40      |
| Control Unit | 27      | 27      |
| Treatment    | -       | -       |
| Circuit #    | 41      | 42      |
| Control Unit | 28      | 28      |
| Treatment    | T4 FMO  | Dose 1  |
| Circuit #    | 43      | 44      |
| Control Unit | 28      | 28      |
| Treatment    | -       | -       |
| Circuit #    | 45      | 46      |
| Control Unit | 28      | 28      |
| Treatment    | Dose 2  | T5 FMO  |
| Circuit #    | 47      | 48      |
| Control Unit | 28      | 28      |

**B**

| Top Incubator | Circuit |        | Operator |
|---------------|---------|--------|----------|
|               | LHS     | RHS    |          |
| Treatment     | 50      | 500    | A        |
| Circuit #     |         |        |          |
| Control Unit  |         |        |          |
| Treatment     | 10      | 0      | A        |
| Circuit #     |         |        |          |
| Control Unit  |         |        |          |
| Treatment     | VACANT  | VACANT | A        |
| Circuit #     |         |        |          |
| Control Unit  |         |        |          |
| Treatment     | 100     | 50     | A        |
| Circuit #     |         |        |          |
| Control Unit  |         |        |          |
| Treatment     | 500     | 10     | A        |
| Circuit #     |         |        |          |
| Control Unit  |         |        |          |
| Treatment     | VACANT  | VACANT | A        |
| Circuit #     |         |        |          |
| Control Unit  |         |        |          |
| Treatment     | 0       | 100    | B        |
| Circuit #     |         |        |          |
| Control Unit  |         |        |          |
| Treatment     | 50      | 500    | B        |
| Circuit #     |         |        |          |
| Control Unit  |         |        |          |
| Treatment     | VACANT  | VACANT | B        |
| Circuit #     |         |        |          |
| Control Unit  |         |        |          |
| Treatment     | 10      | 0      | B        |
| Circuit #     |         |        |          |
| Control Unit  |         |        |          |
| Treatment     | 0       | 100    | B        |
| Circuit #     |         |        |          |
| Control Unit  |         |        |          |
| Treatment     | VACANT  | VACANT | B        |
| Circuit #     |         |        |          |
| Control Unit  |         |        |          |
| Treatment     | 100     | 50     | B        |
| Circuit #     |         |        |          |
| Control Unit  |         |        |          |
| Treatment     | VACANT  | VACANT | B        |
| Circuit #     |         |        |          |
| Control Unit  |         |        |          |

| Bottom Incubator | Circuit |        | Operator |
|------------------|---------|--------|----------|
|                  | LHS     | RHS    |          |
| Treatment        | VACANT  | VACANT | B        |
| Circuit #        |         |        |          |
| Control Unit     |         |        |          |
| Treatment        | 500     | 10     | B        |
| Circuit #        |         |        |          |
| Control Unit     |         |        |          |
| Treatment        | 0       | 100    | B        |
| Circuit #        |         |        |          |
| Control Unit     |         |        |          |
| Treatment        | VACANT  | VACANT | B        |
| Circuit #        |         |        |          |
| Control Unit     |         |        |          |
| Treatment        | 50      | 500    | B        |
| Circuit #        |         |        |          |
| Control Unit     |         |        |          |
| Treatment        | 10      | 0      | B        |
| Circuit #        |         |        |          |
| Control Unit     |         |        |          |
| Treatment        | VACANT  | VACANT | A        |
| Circuit #        |         |        |          |
| Control Unit     |         |        |          |
| Treatment        | 100     | 50     | A        |
| Circuit #        |         |        |          |
| Control Unit     |         |        |          |
| Treatment        | 500     | 10     | A        |
| Circuit #        |         |        |          |
| Control Unit     |         |        |          |
| Treatment        | VACANT  | VACANT | A        |
| Circuit #        |         |        |          |
| Control Unit     |         |        |          |
| Treatment        | 0       | 100    | A        |
| Circuit #        |         |        |          |
| Control Unit     |         |        |          |
| Treatment        | VACANT  | VACANT | A        |
| Circuit #        |         |        |          |
| Control Unit     |         |        |          |

# Supplementary Figure 3

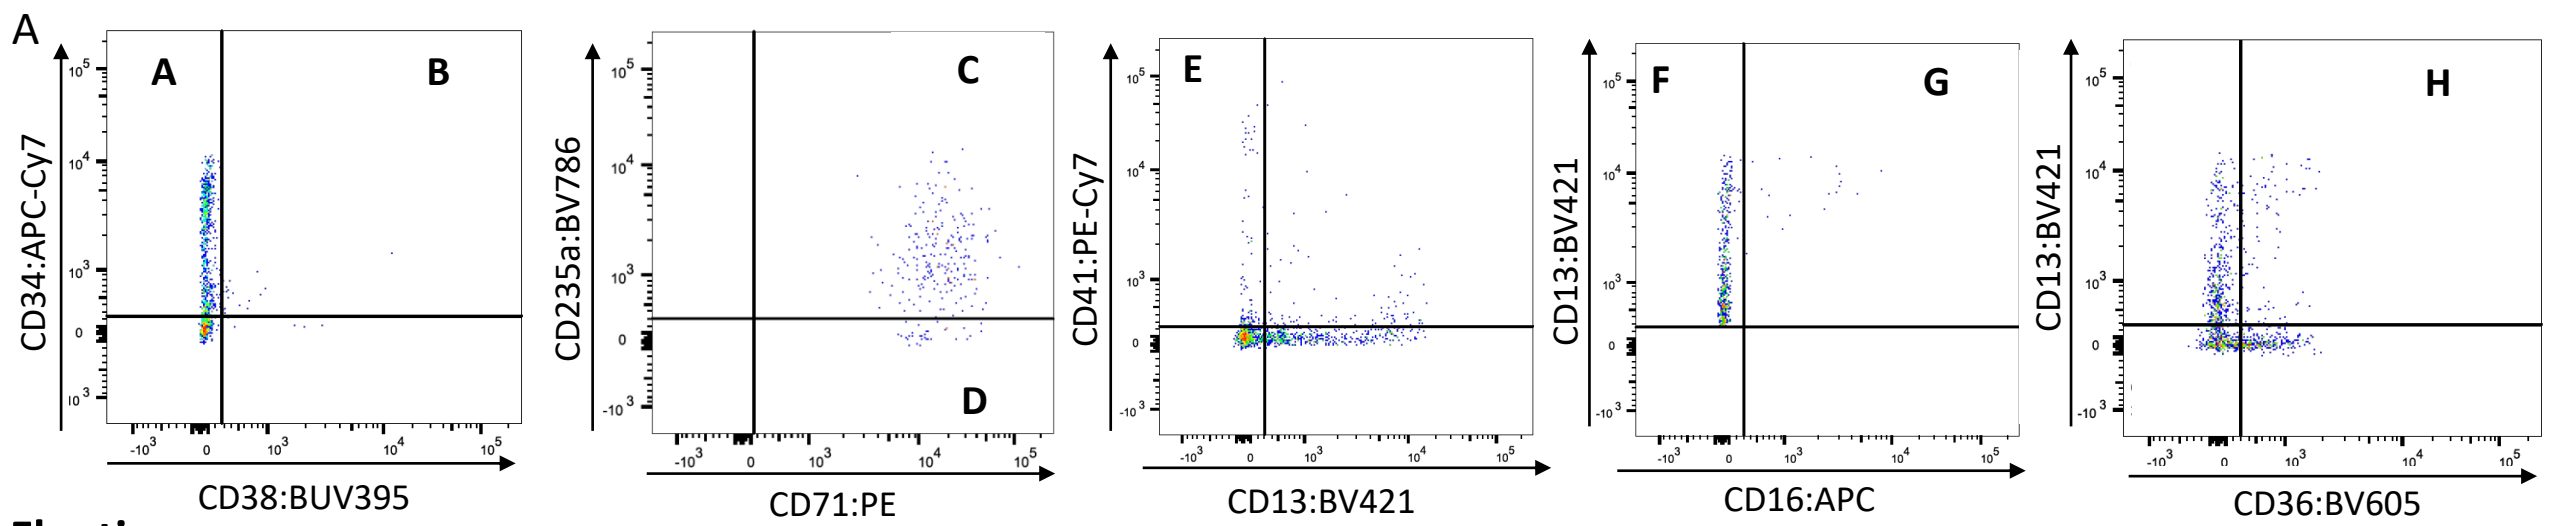

**Floating**

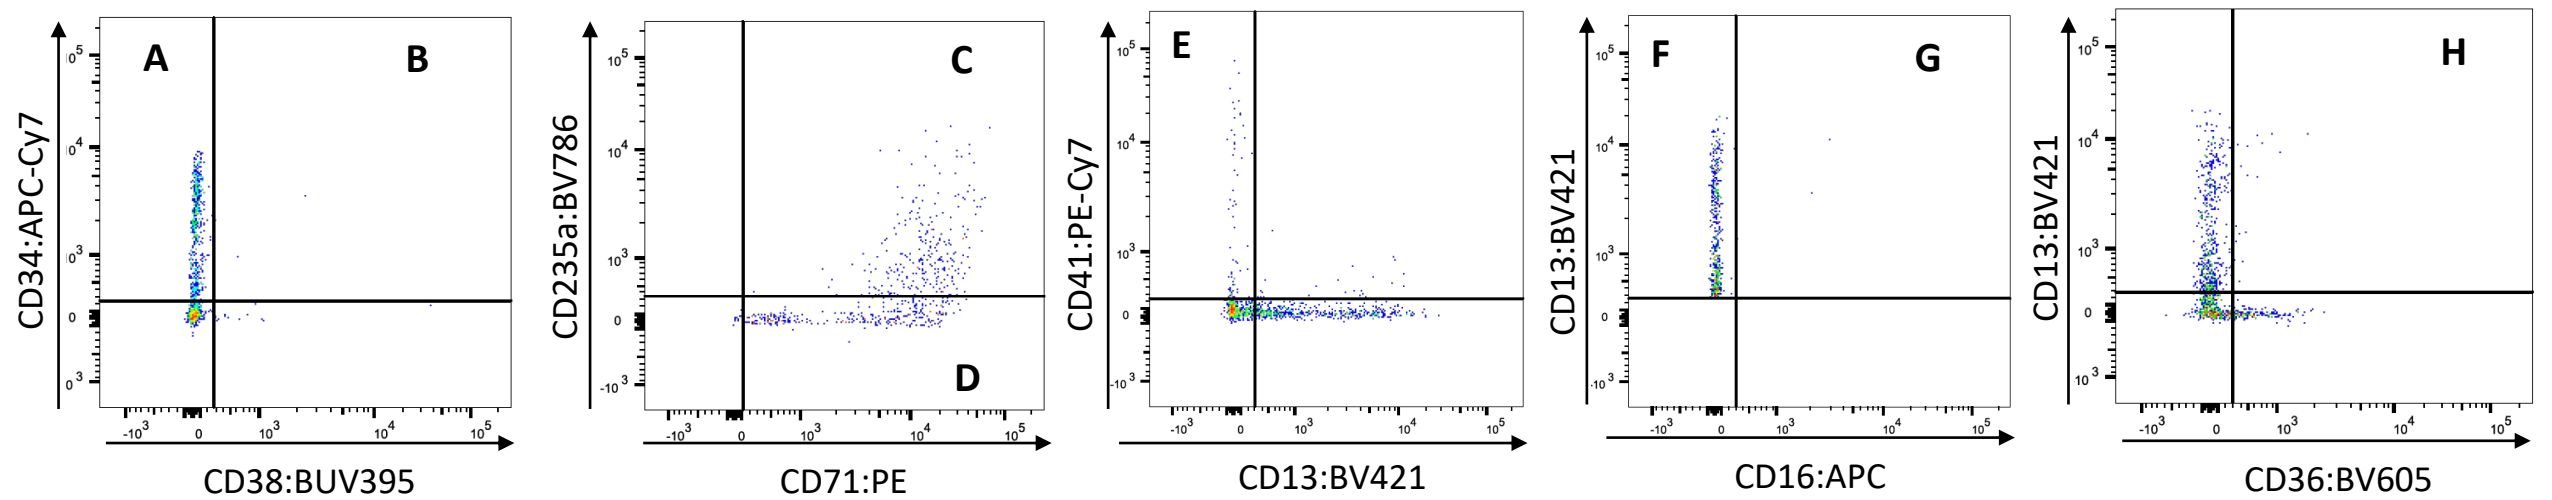

**Scaffold**

Example of Floating versus Scaffold gating for a control group circuit at Day 0.

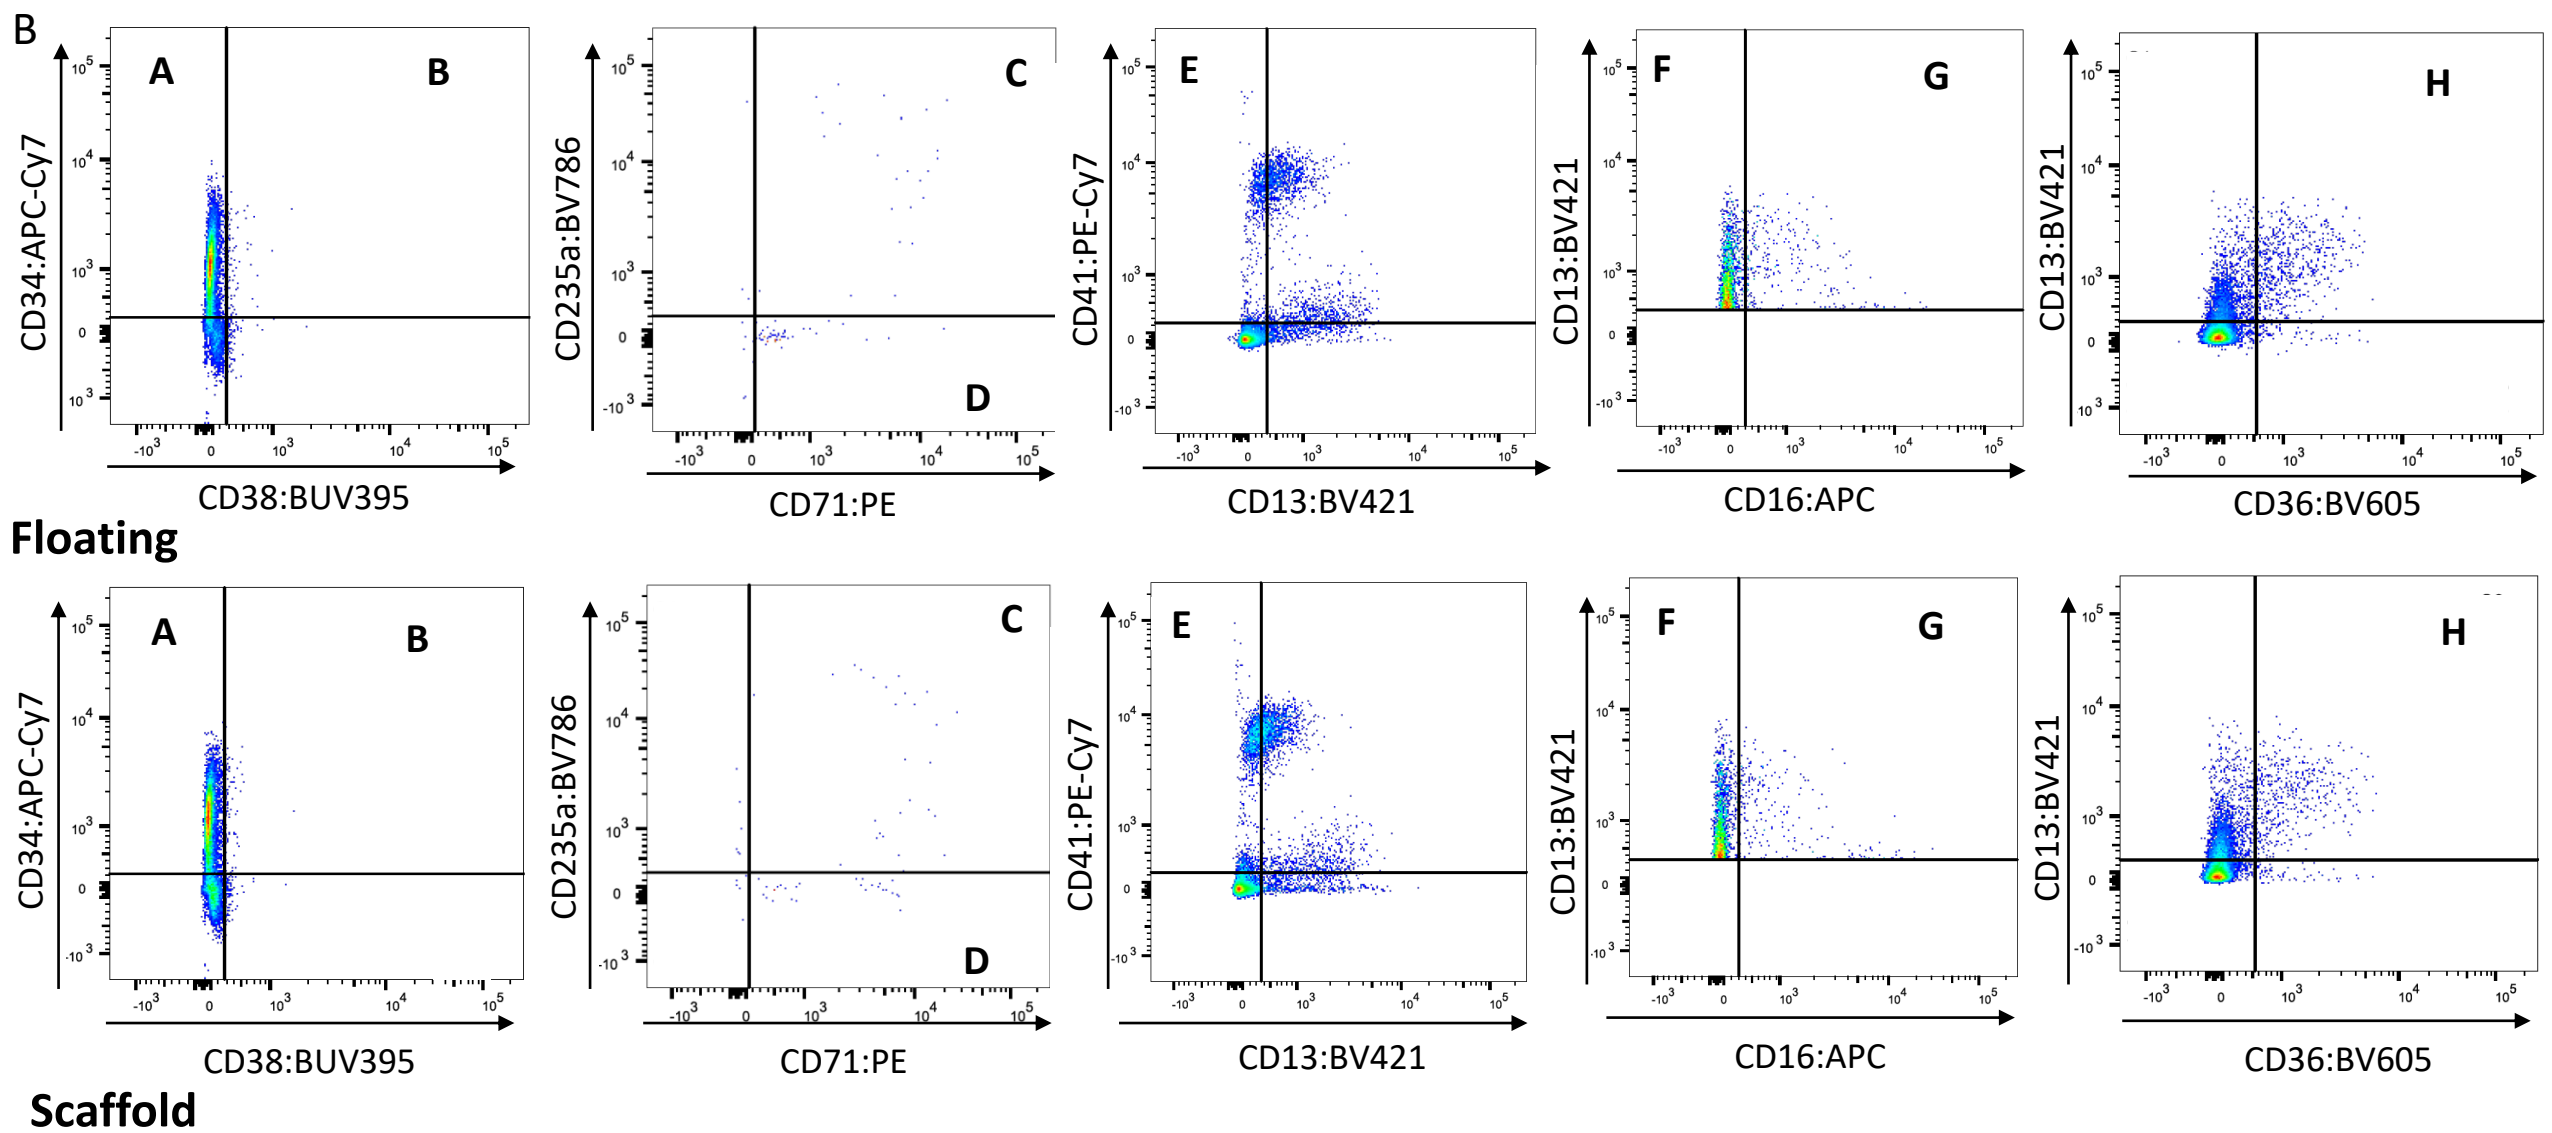

Example of Floating versus Scaffold gating for a control group circuit at Day 14 Recovery.

**C**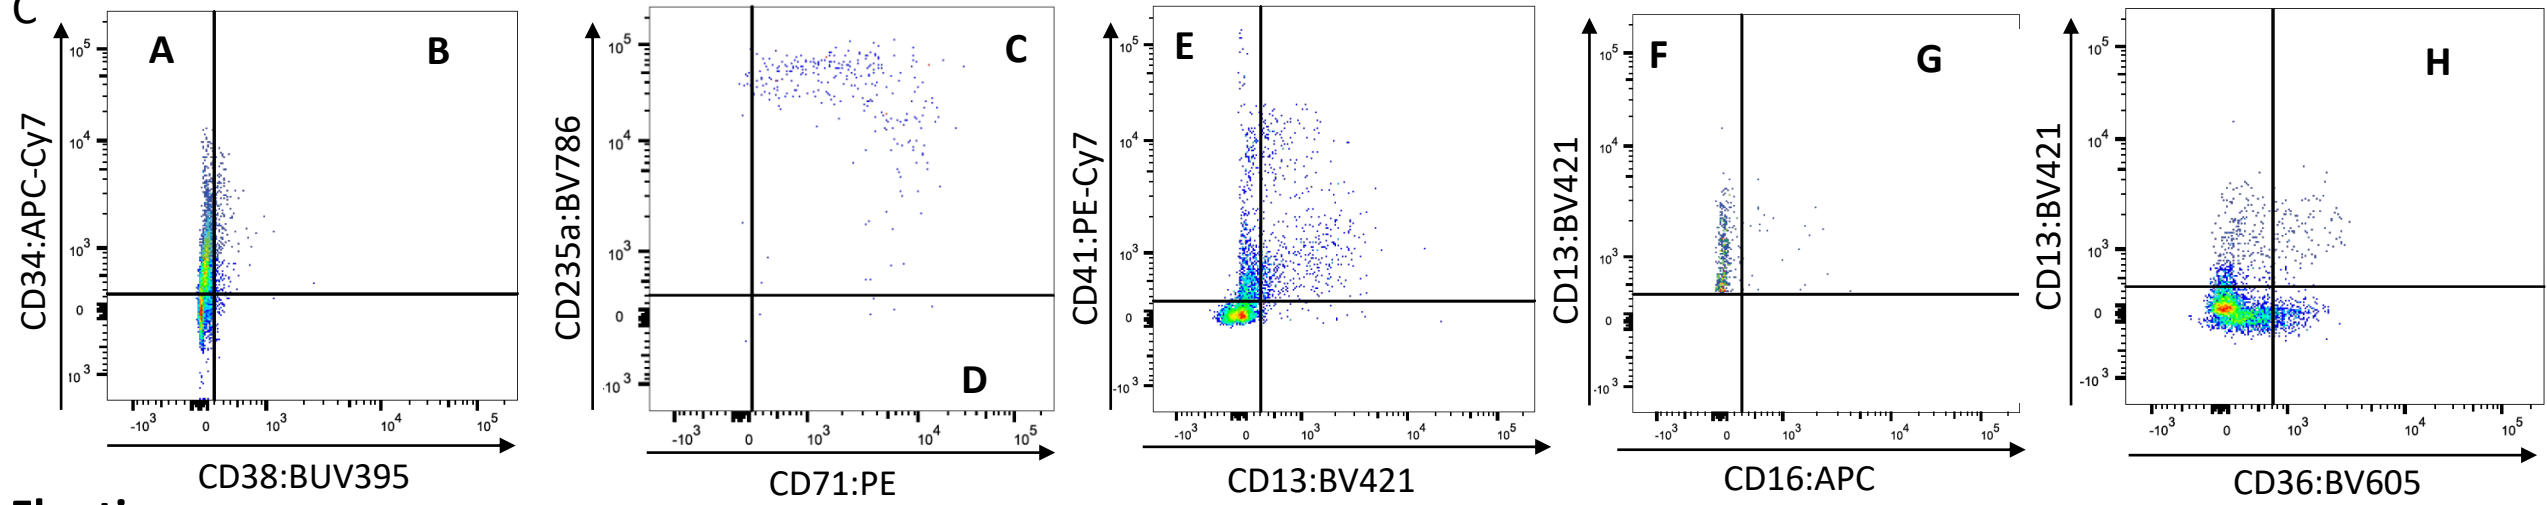**Floating**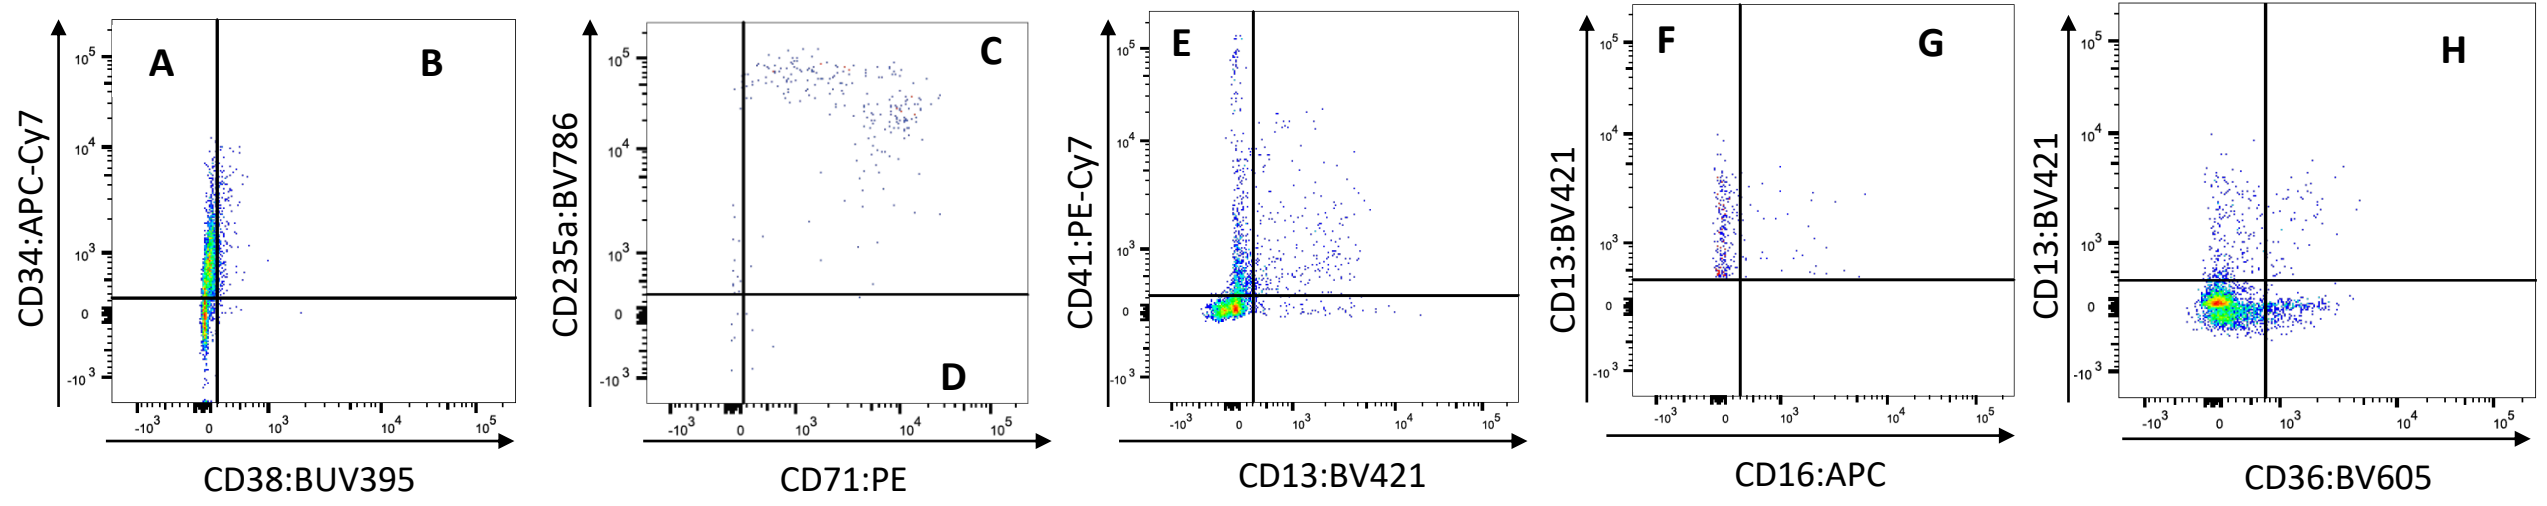**Scaffold**

Example of Floating versus Scaffold gating for a low dose group circuit at Day 14.

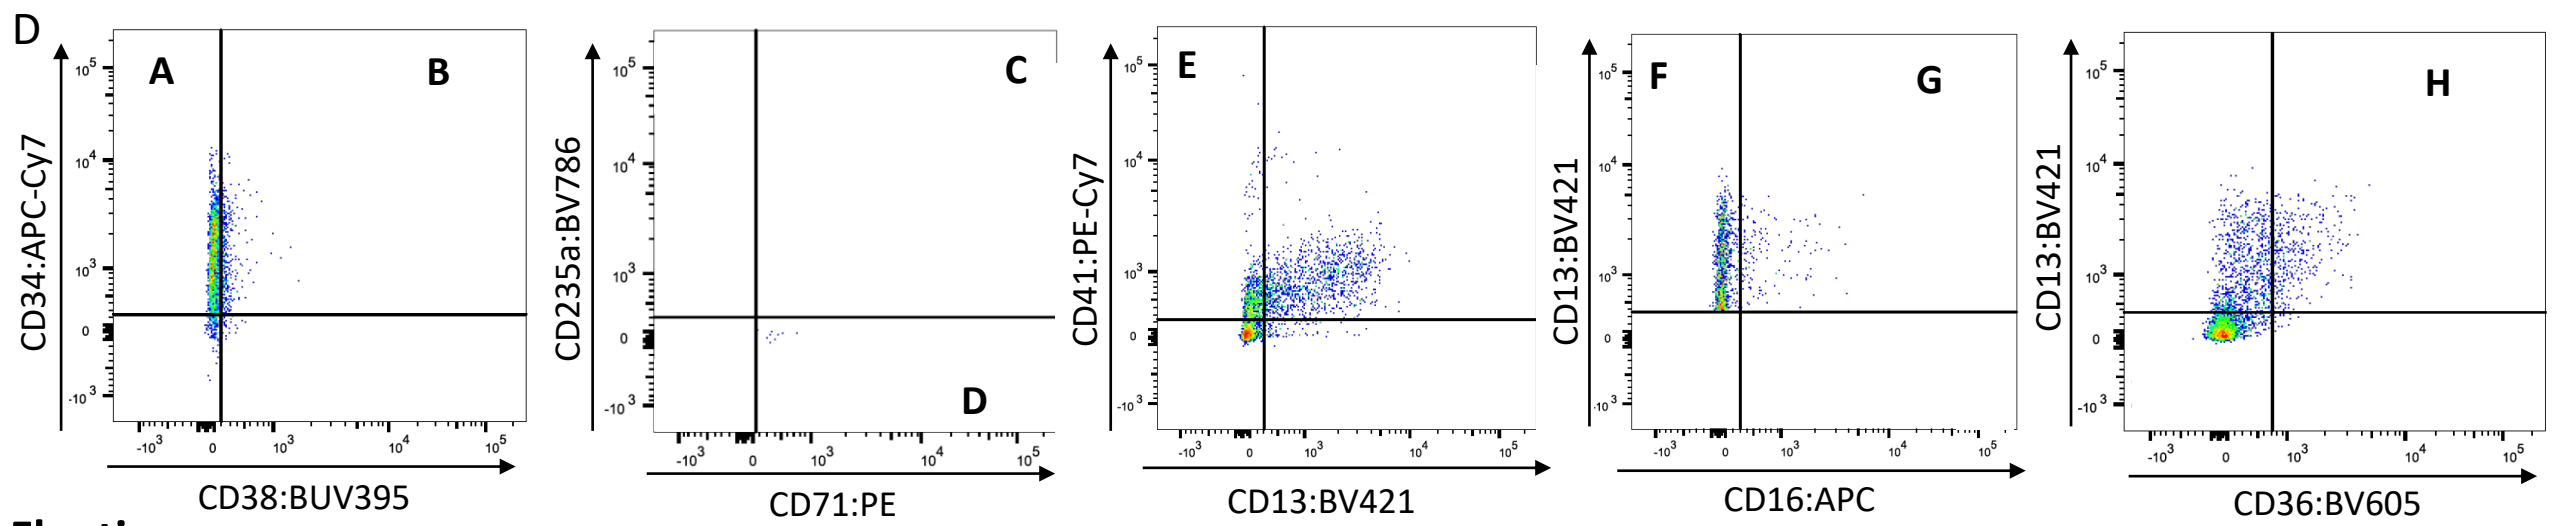

## Floating

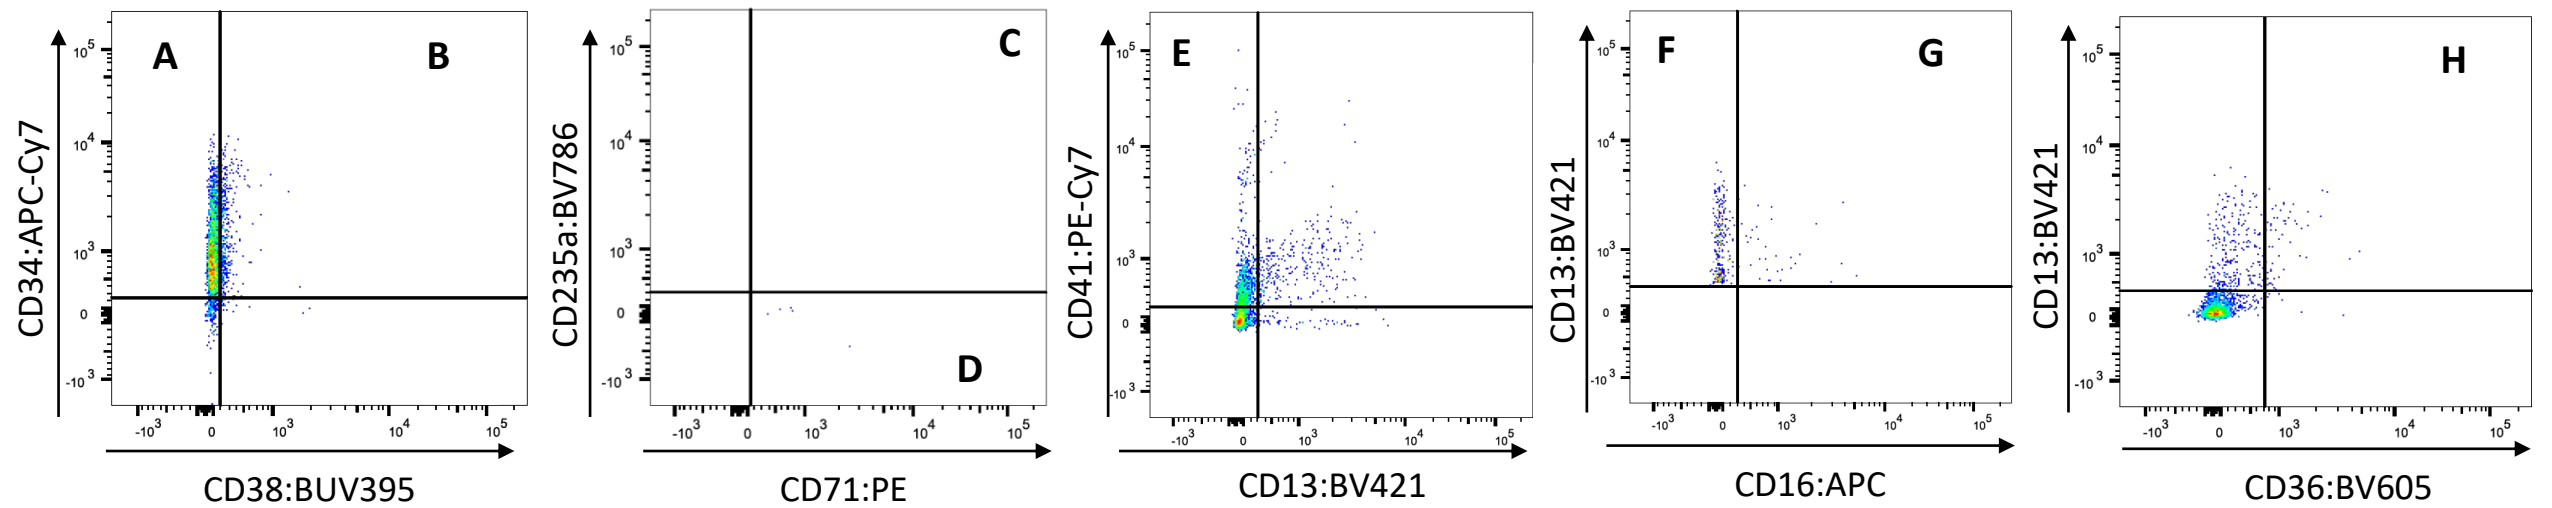

## Scaffold

Example of Floating versus Scaffold gating for a high dose group circuit at Day 14.

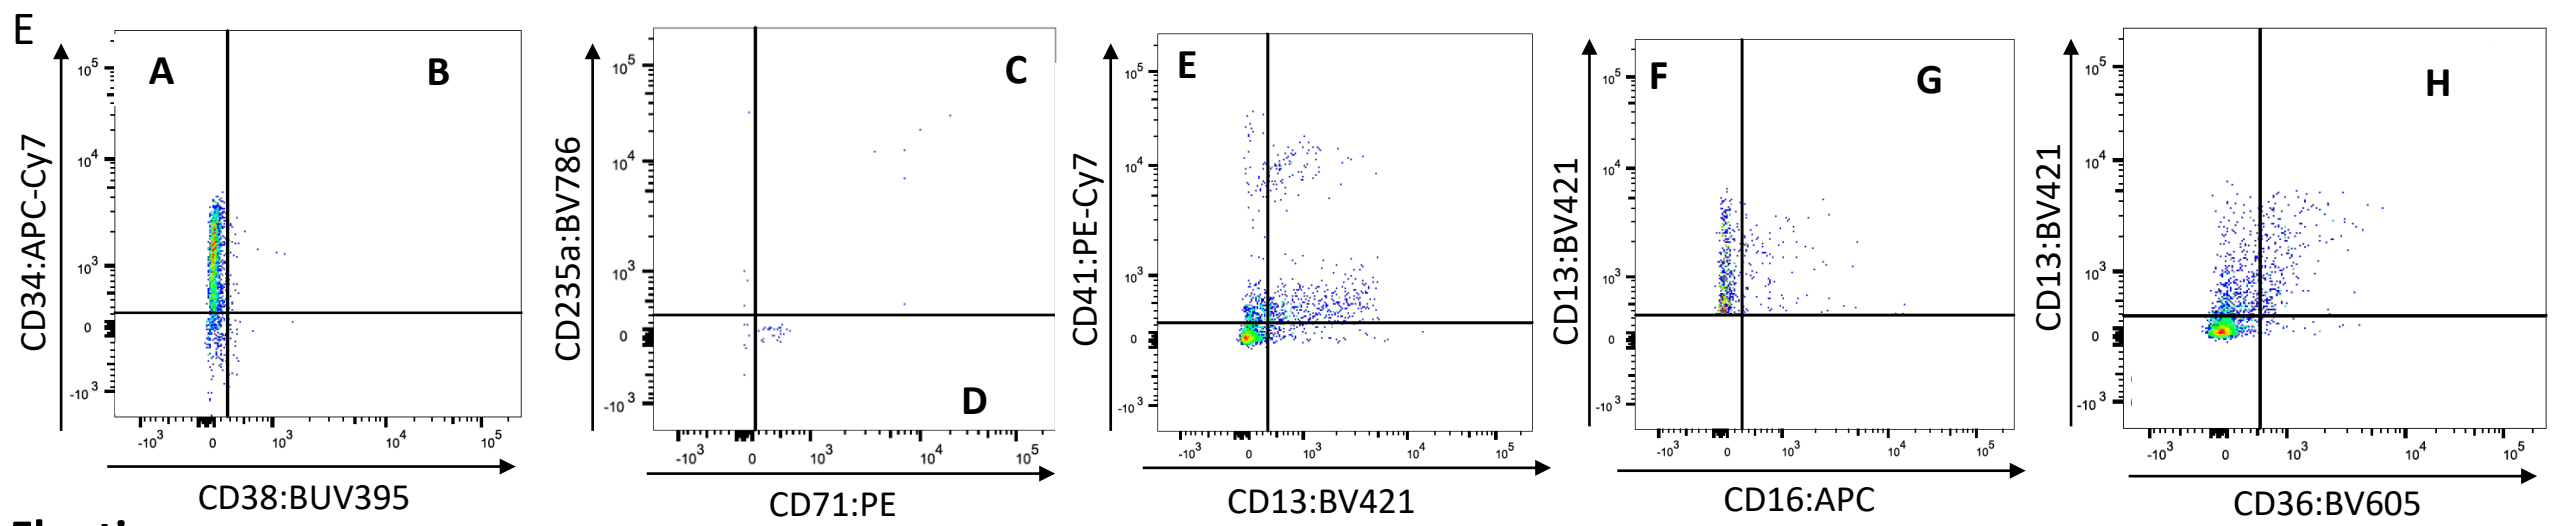

**Floating**

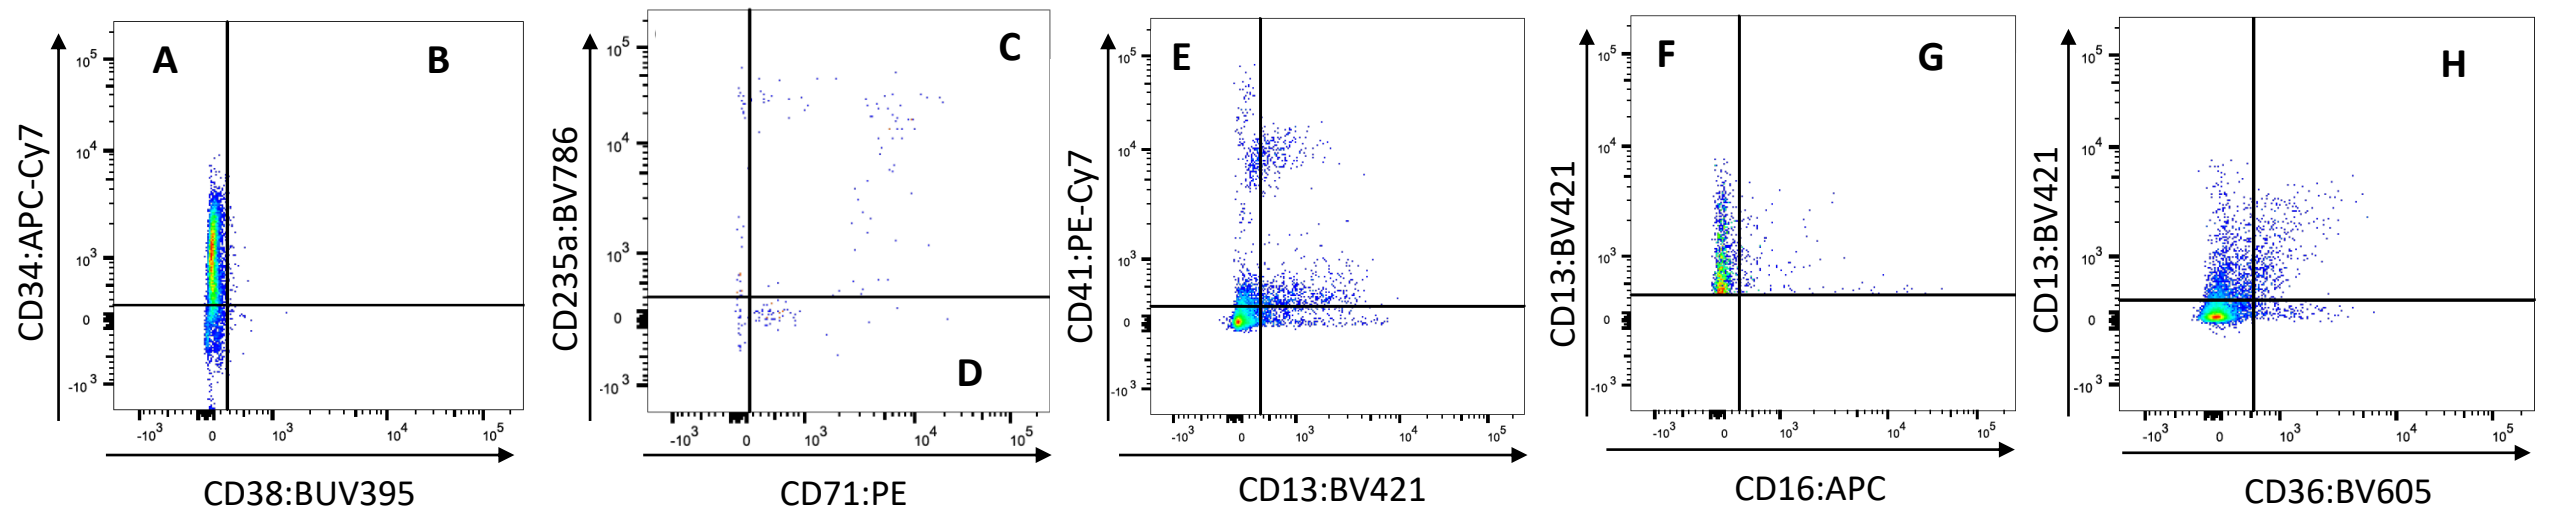

**Scaffold**

Example of Floating versus Scaffold gating for a low dose group circuit at Day 14 Recovery.



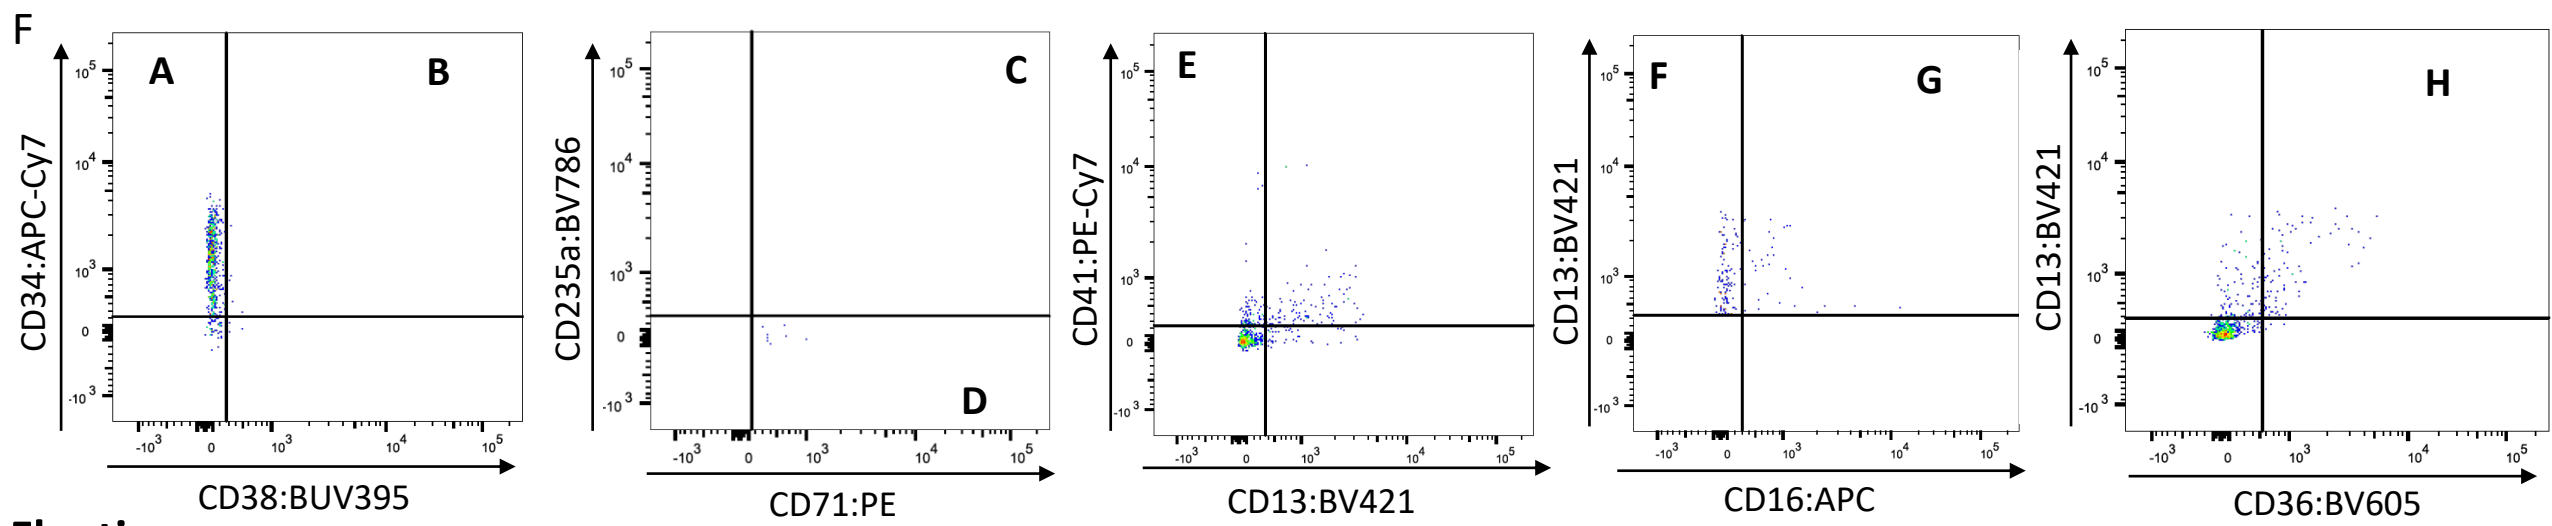

**Floating**

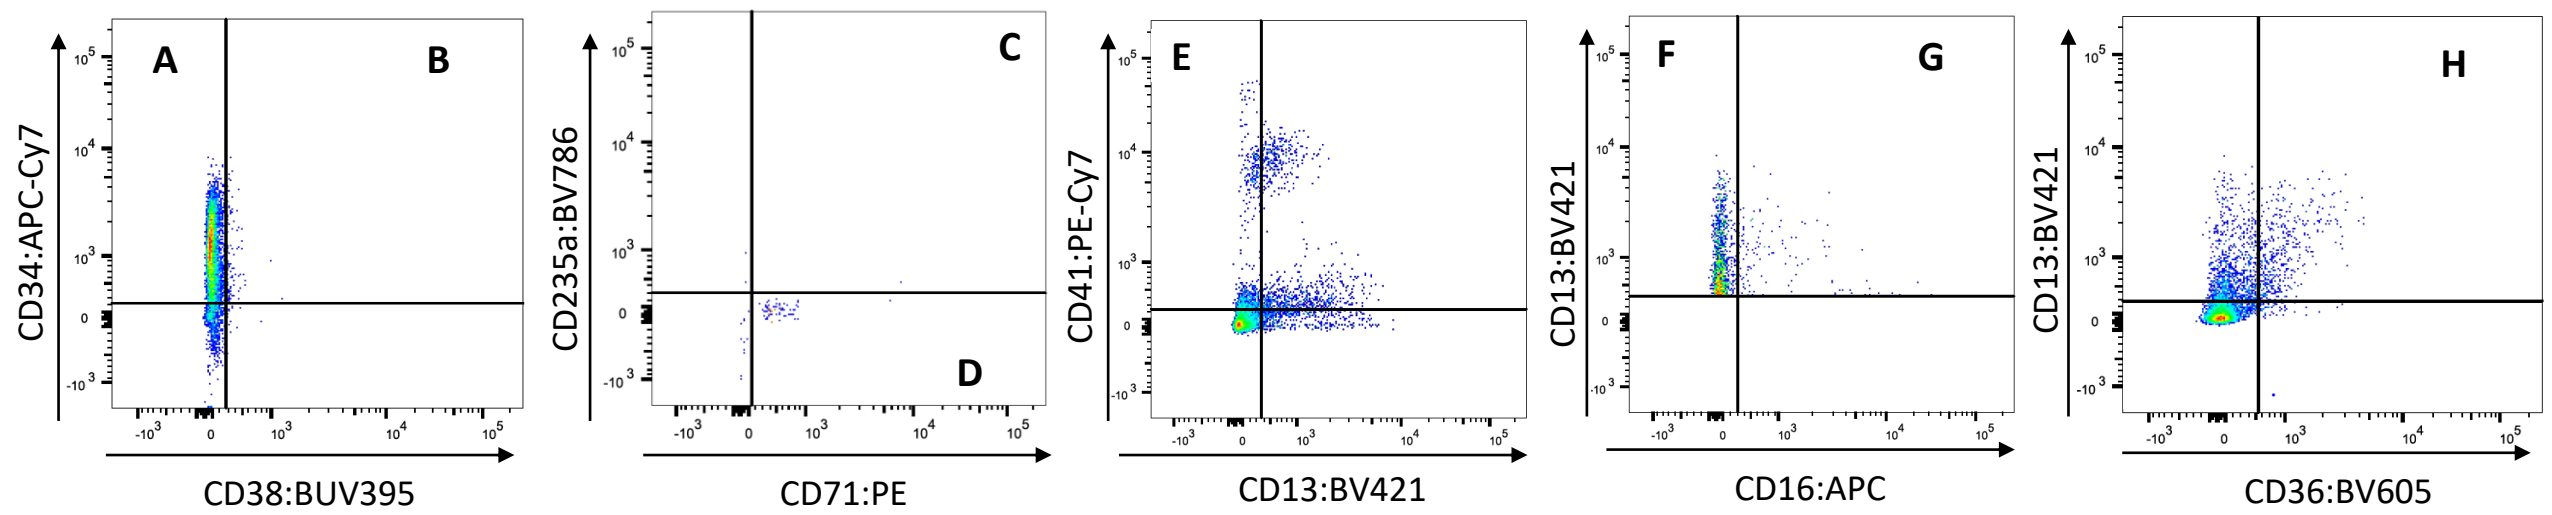

**Scaffold**

Example of Floating versus Scaffold gating for a high dose group circuit at Day 14 Recovery.

# Supplementary Figure 4

(a)

Dead Cell %

|                               | 1 Floating | 1 Scaffold | 2 Floating | 3 Floating   |
|-------------------------------|------------|------------|------------|--------------|
| Operator                      | 0.067 .    | 0.835      | 0.074 .    | 0.118        |
| Side                          | 0.216      | 0.863      | 0.770      | 0.089        |
| Control Unit within incubator | 0.126      | 0.485      | 0.093 .    | 0.877        |
| Incubator                     | 0.028 *    | 0.061 .    | 0.020 *    | 0.000613 *** |

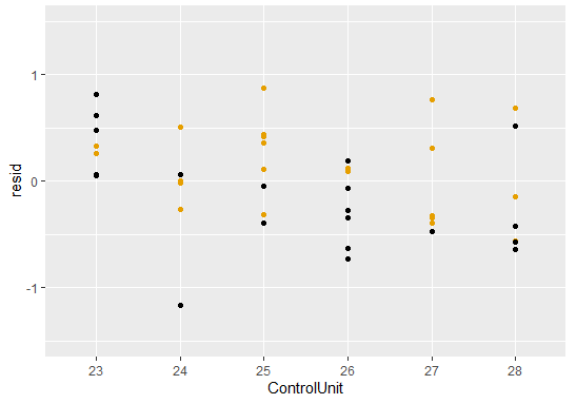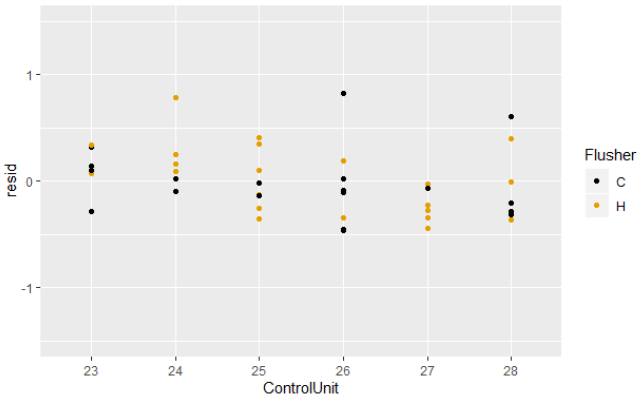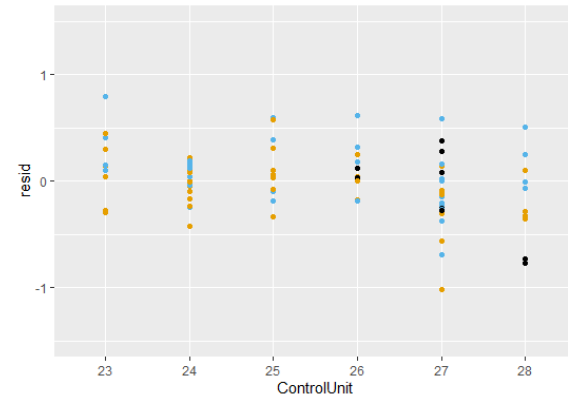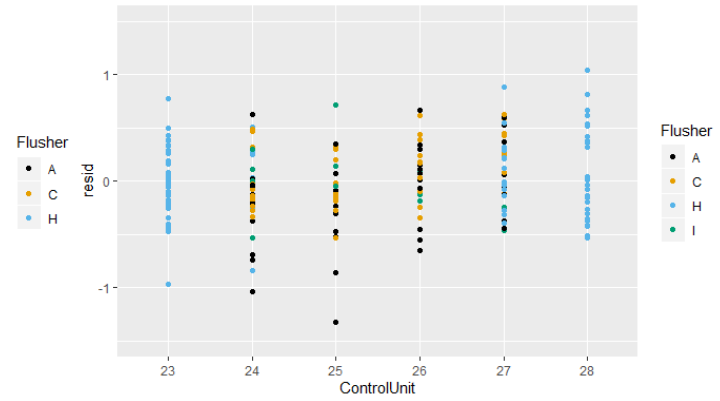

(b)

Late Erythroid %

|                               | 1 Floating | 1 Scaffold | 2 Floating                 | 3 Floating                |
|-------------------------------|------------|------------|----------------------------|---------------------------|
| Operator                      | 0.254      | 0.365      | 0.316                      | 0.844                     |
| Side                          | 0.493      | 0.840      | 0.885                      | 0.230 *                   |
| Control Unit within incubator | 0.759      | 0.787      | $2.25 \times 10^{-10}$ *** | $1.78 \times 10^{-6}$ *** |
| Incubator                     | 0.154      | 0.692      | X                          | X                         |
| Control Unit                  | X          | X          | $1.58 \times 10^{-10}$ *** | $3.53 \times 10^{-6}$ *** |

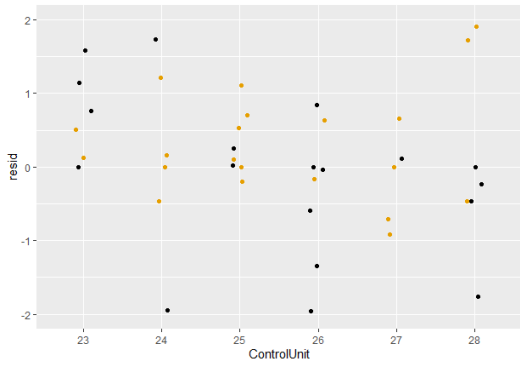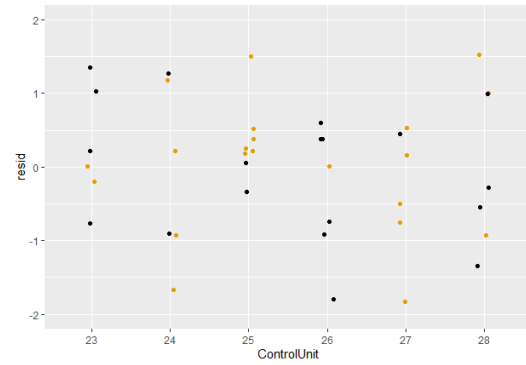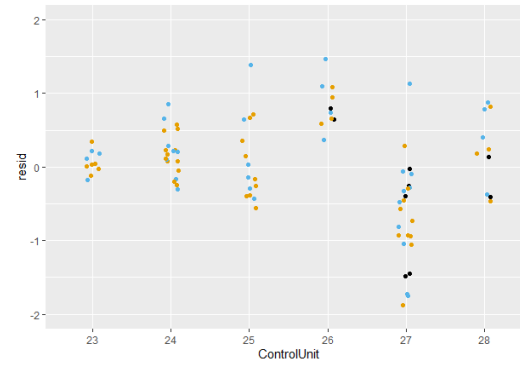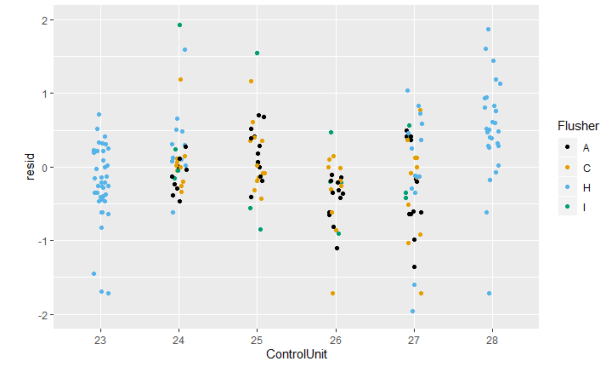

# Supplementary Figure 5

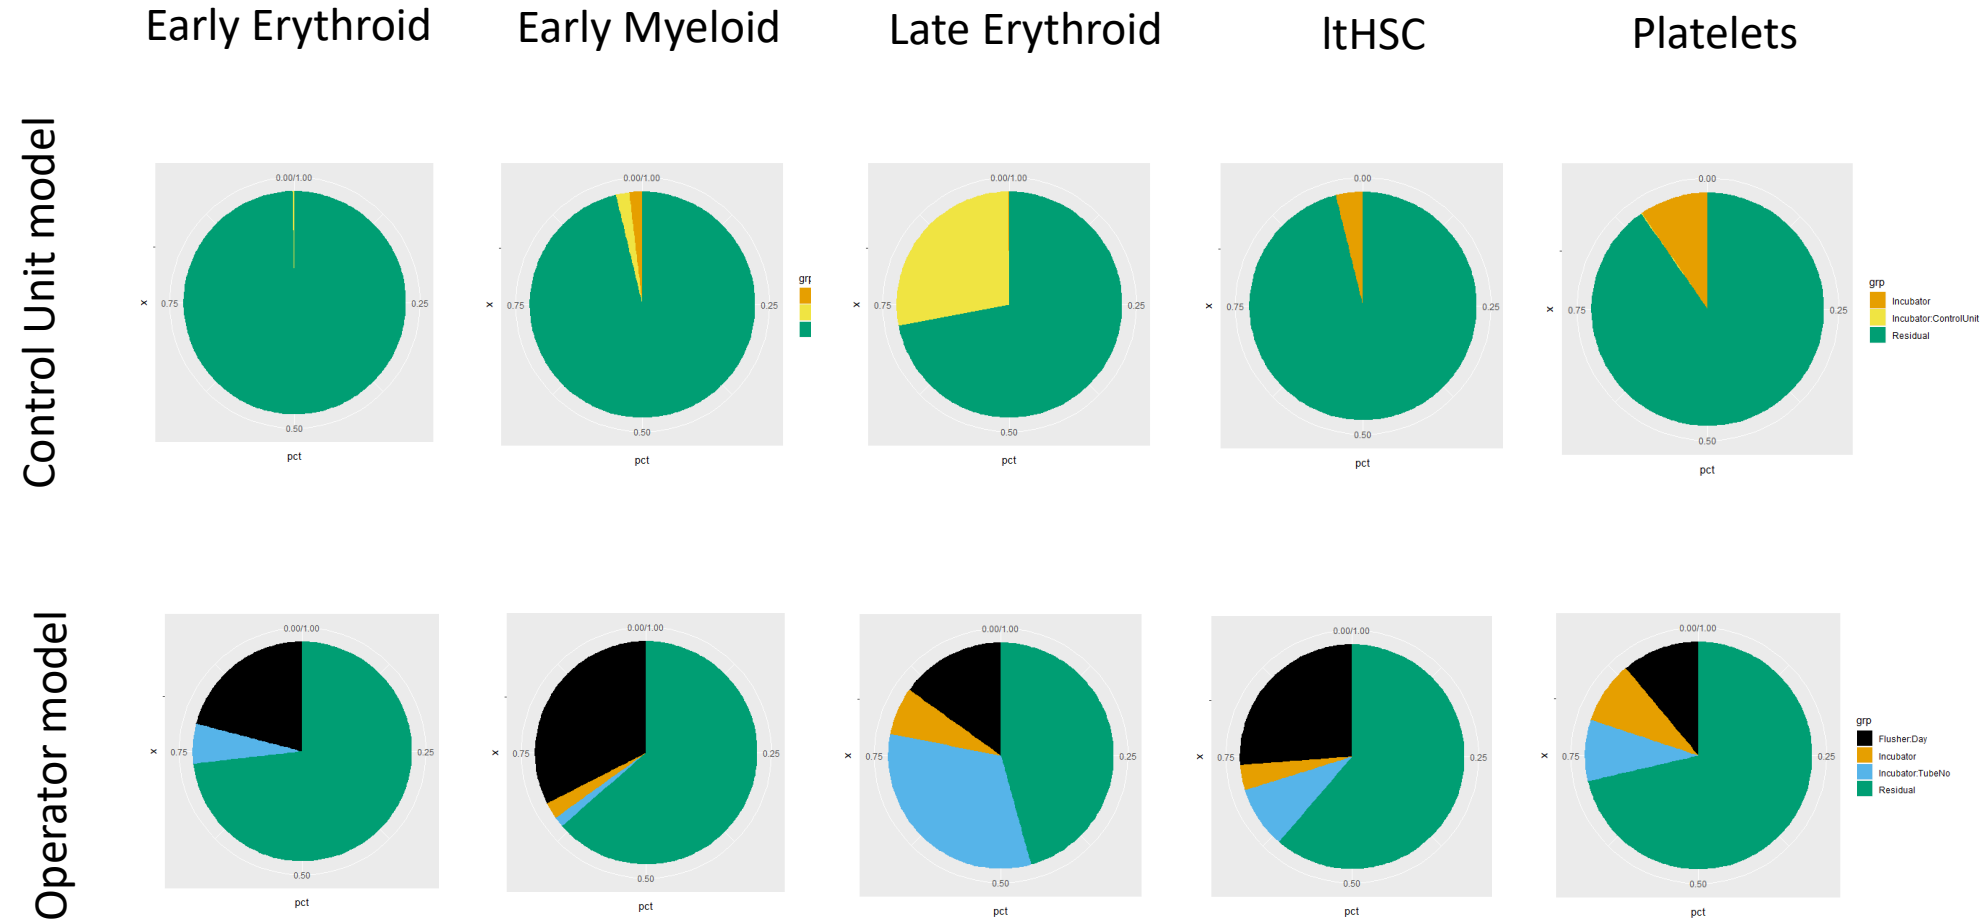

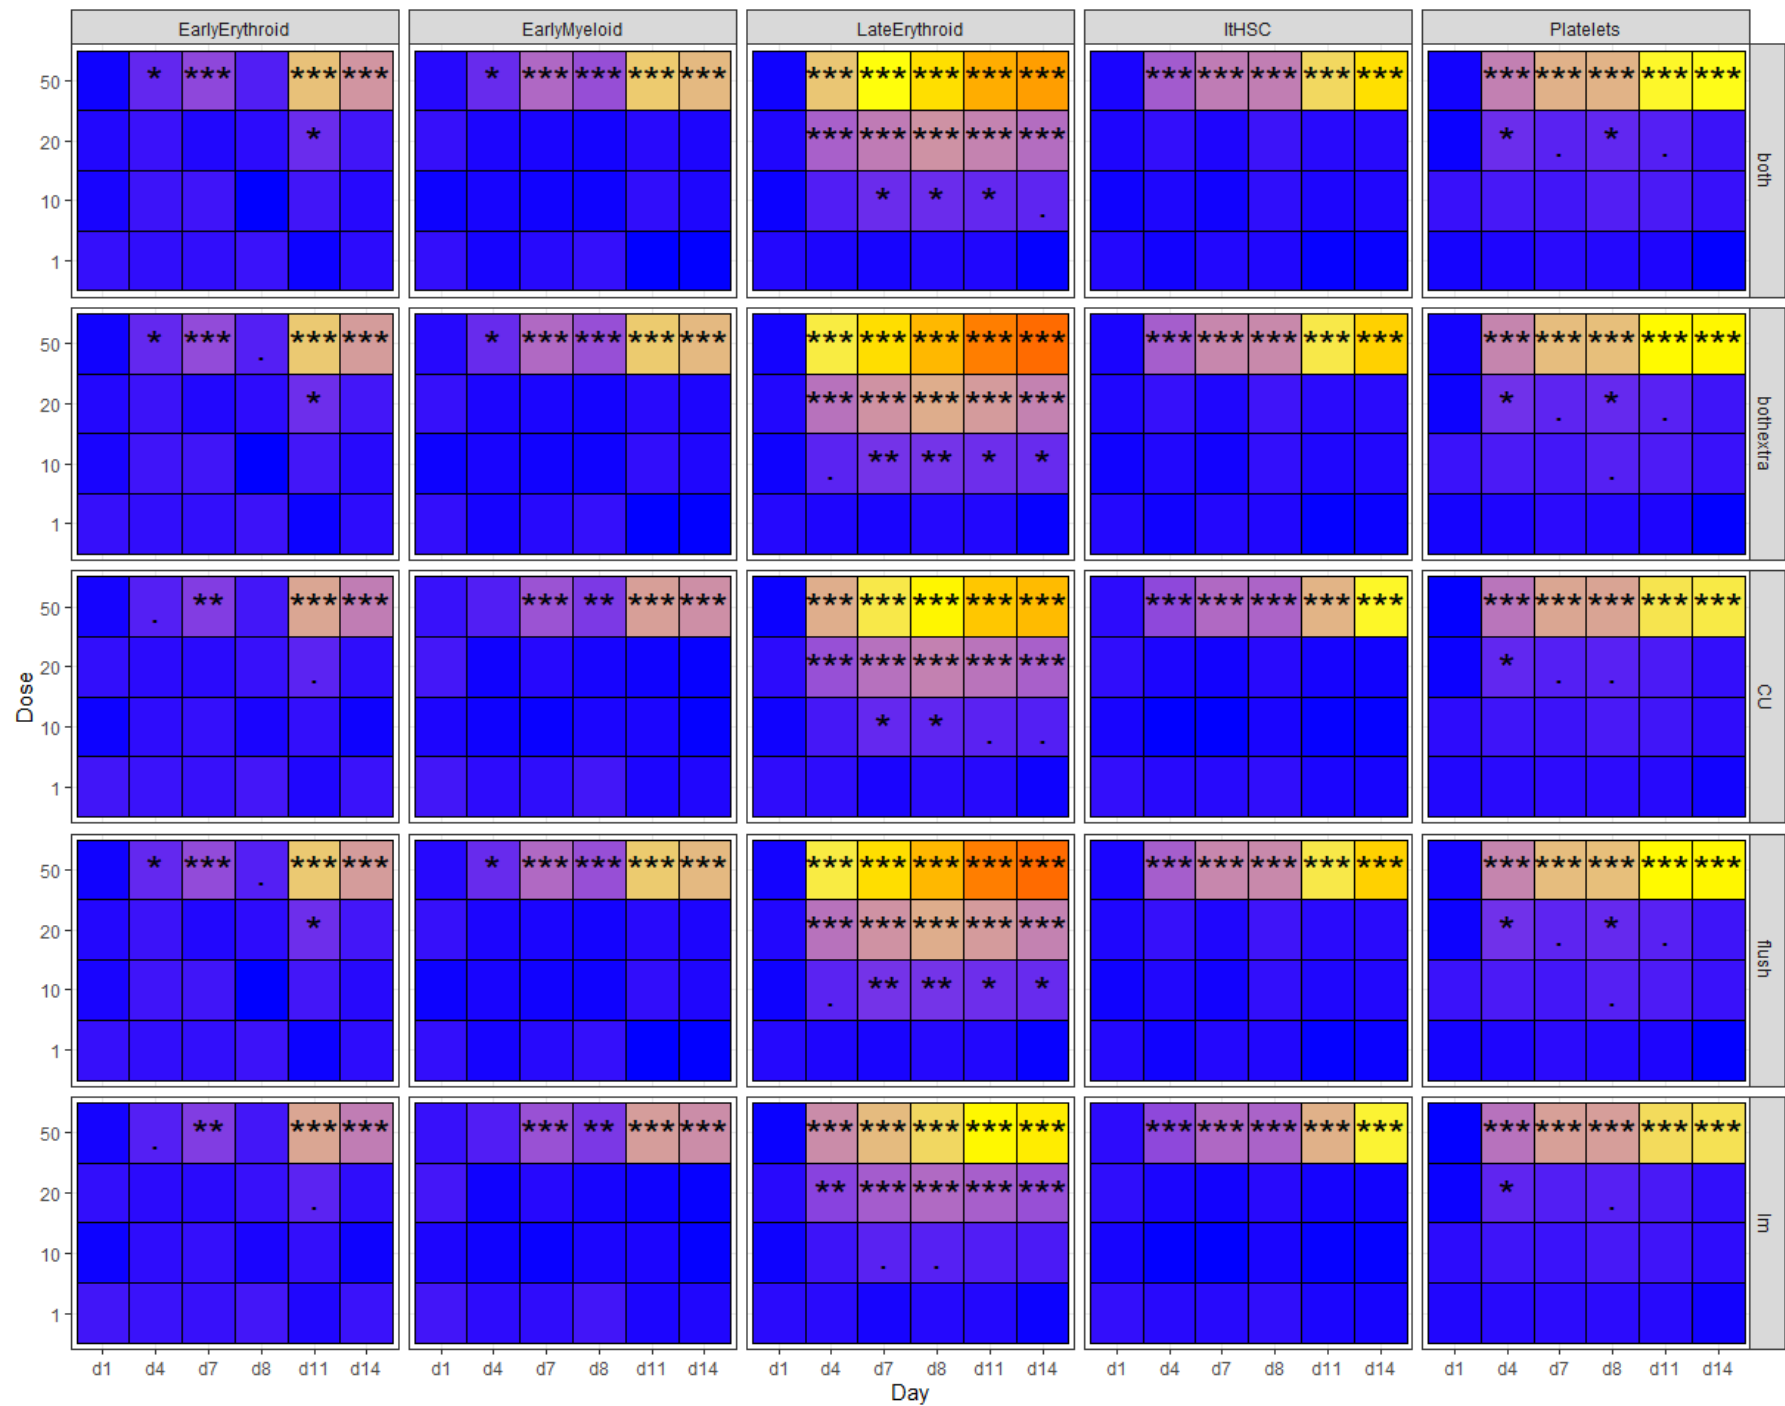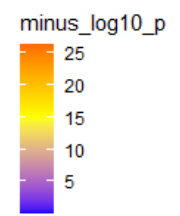

# (data used in Supplementary fig 5)

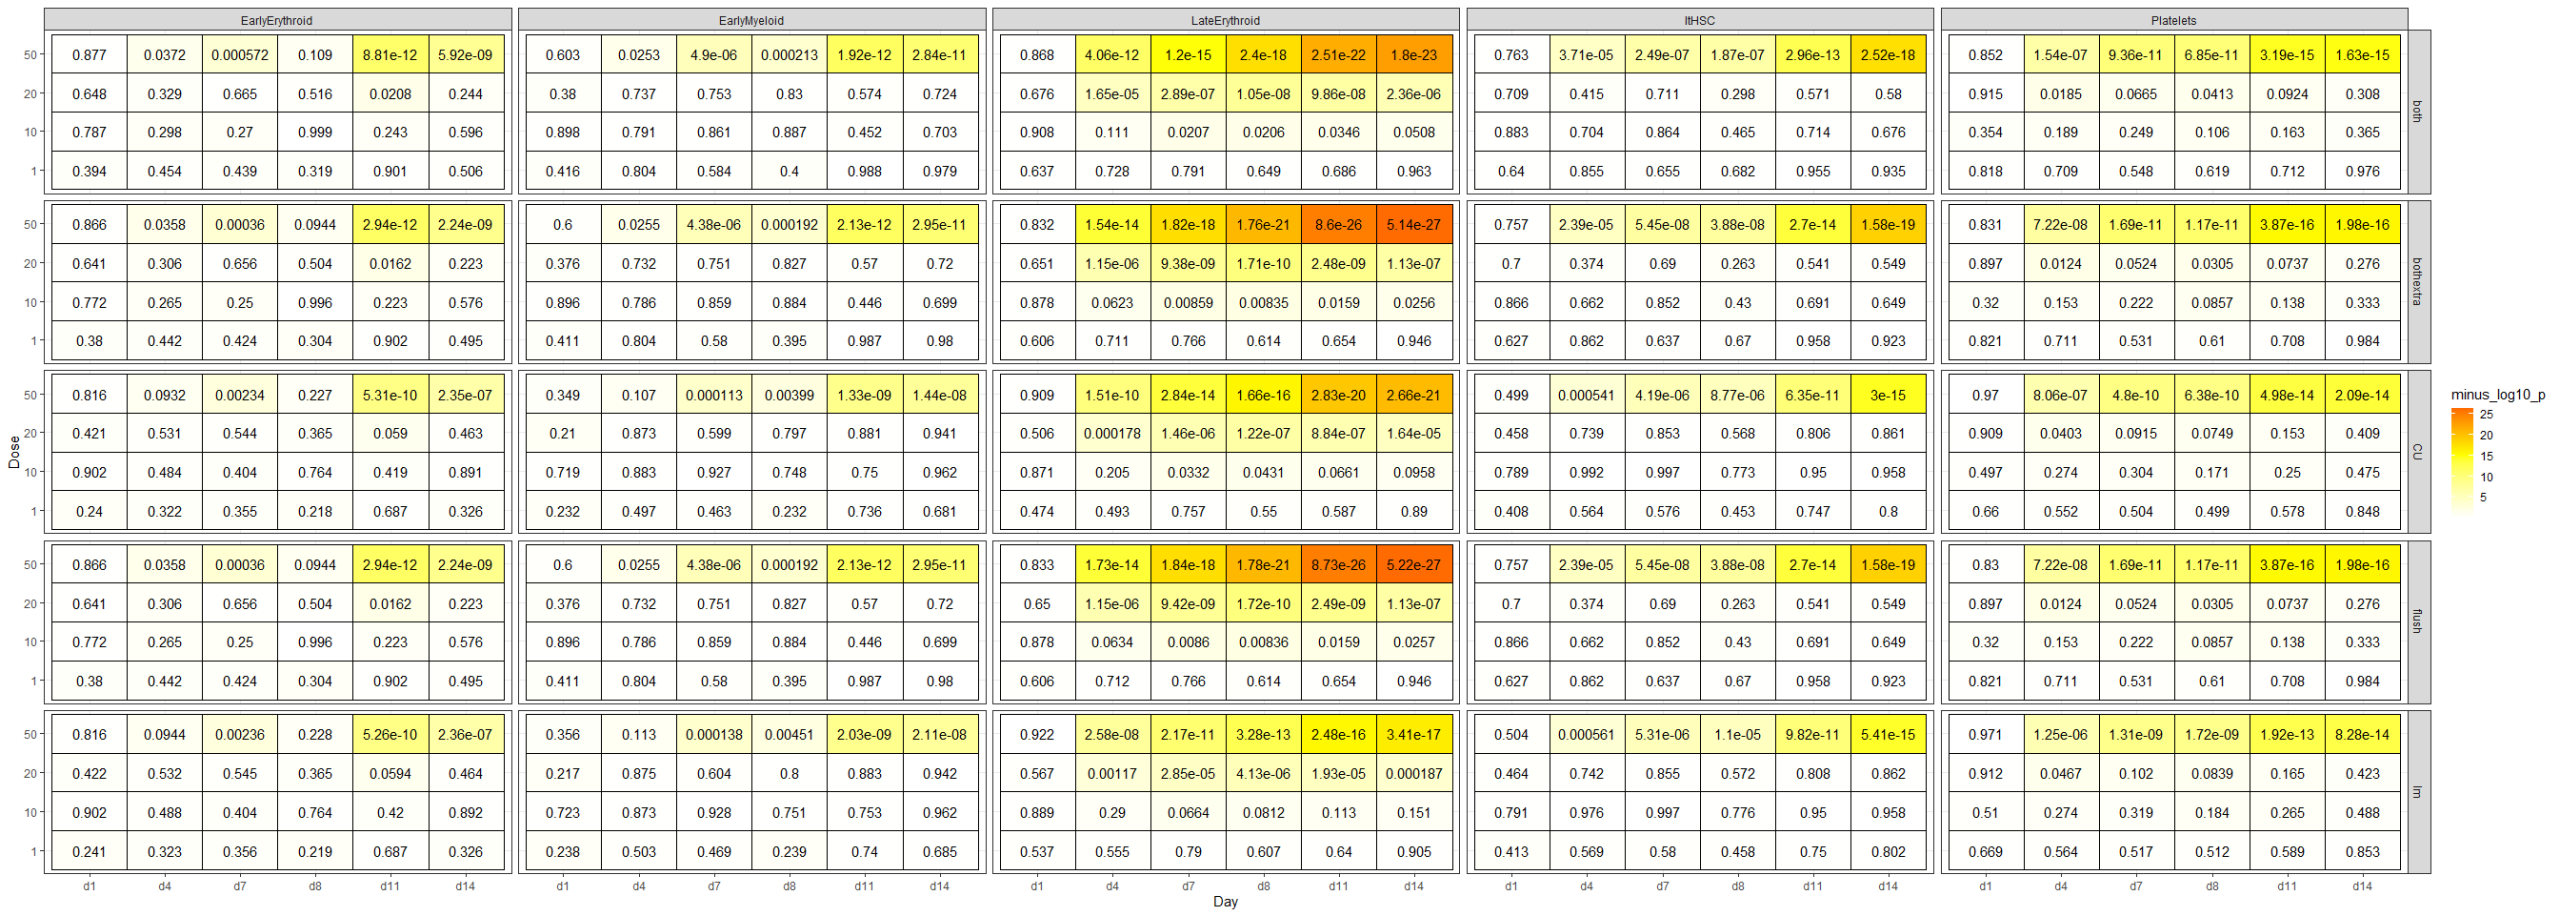

# Supplementary Figure 6



Power calculation: Effect on Late Erythroid lineage (BM-1 Floating)

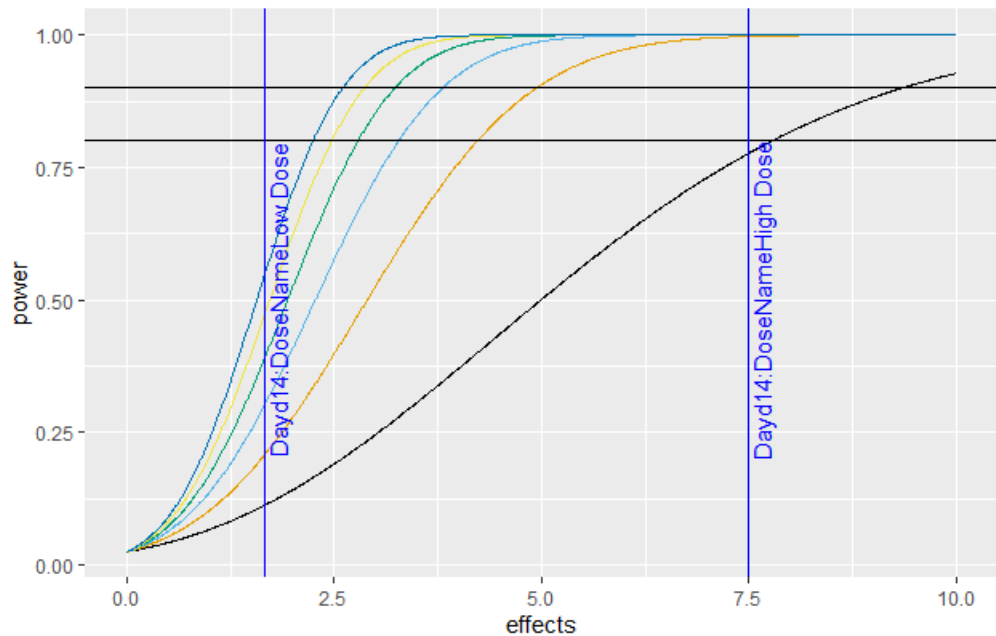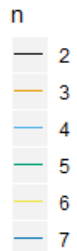

Power calculation: Effect on Late Erythroid lineage (BM-1 Scaffold)

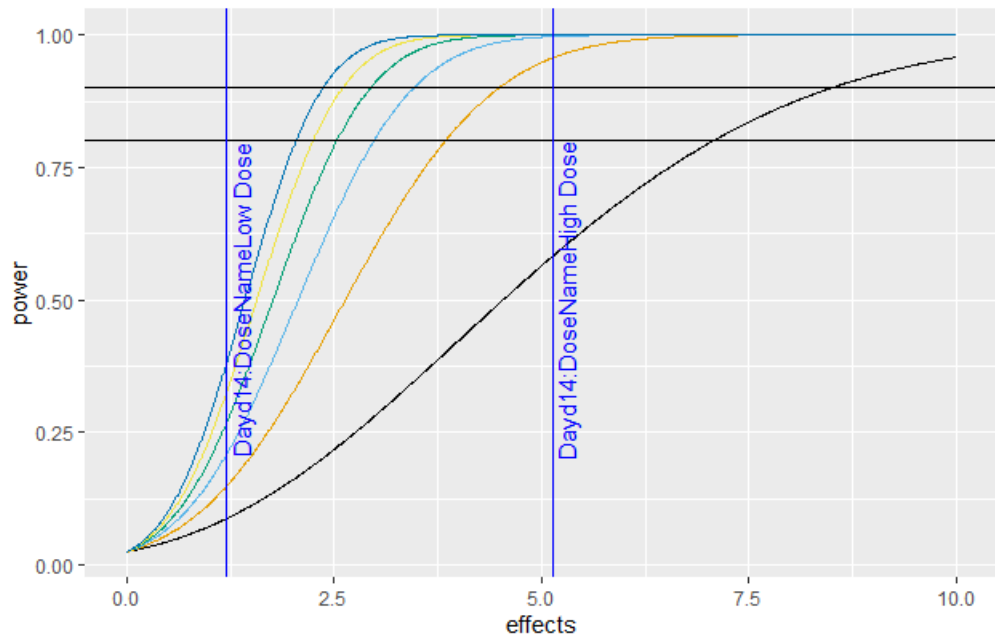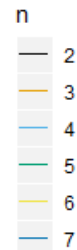

Power calculation: Effect on Late Erythroid lineage (BM-2 Floating)

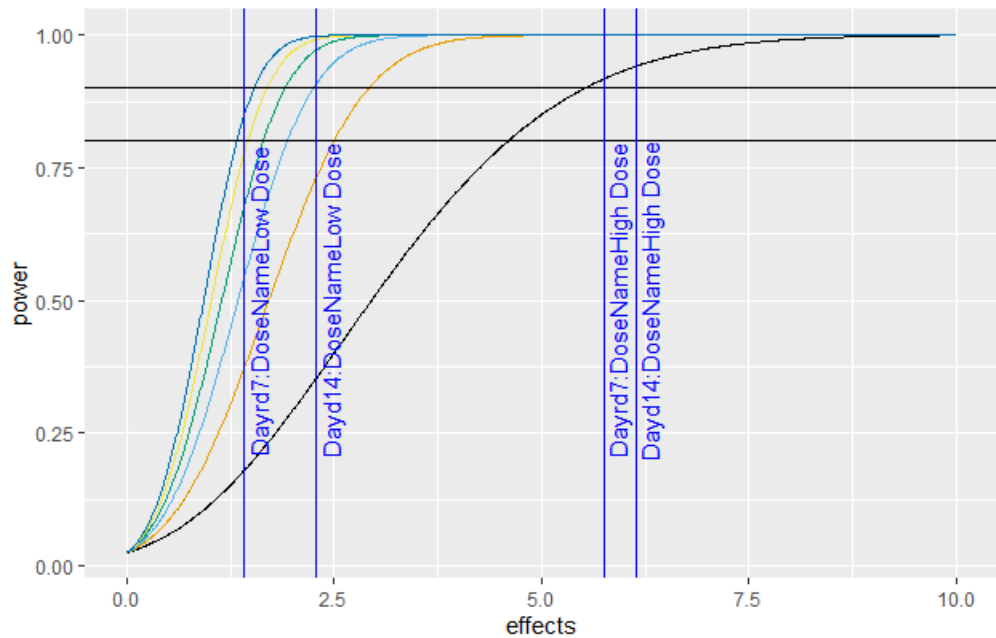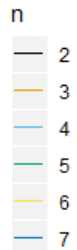

Power calculation: Effect on Late Erythroid lineage (BM-3 Floating)

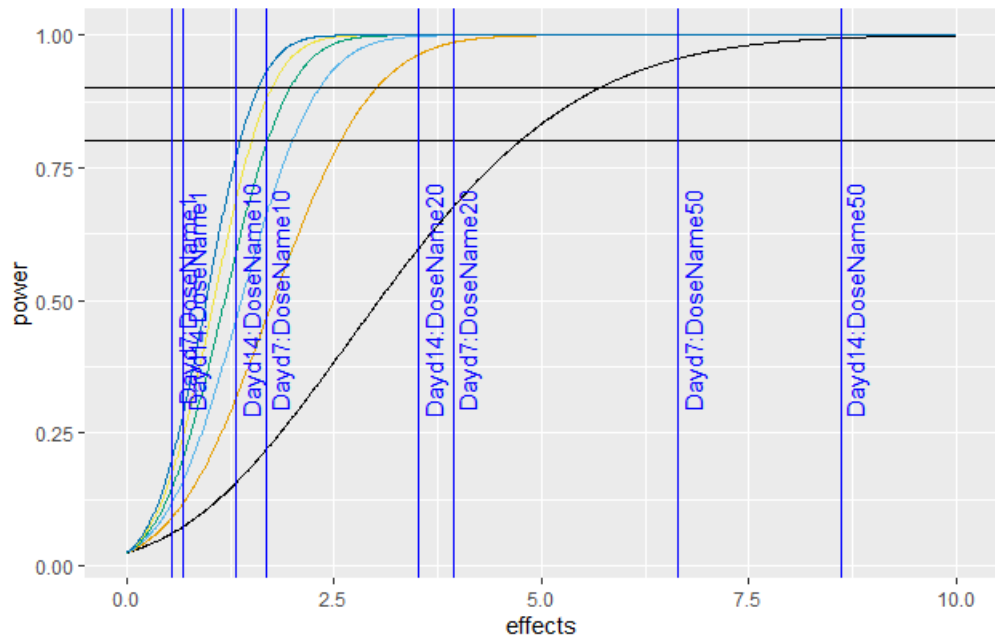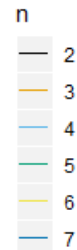

# Supplementary Figure 7

| Top Incubator | Circuit |     | Operator |
|---------------|---------|-----|----------|
|               | LHS     | RHS |          |
| Treatment     | A       | G   | 1        |
| Circuit #     | 1       | 2   |          |
| Control Unit  | 23      | 23  |          |
| Treatment     | C       | D   | 1        |
| Circuit #     | 3       | 4   |          |
| Control Unit  | 23      | 23  |          |
| Treatment     | F       | E   | 1        |
| Circuit #     | 5       | 6   |          |
| Control Unit  | 23      | 23  |          |
| Treatment     | B       | H   | 1        |
| Circuit #     | 7       | 8   |          |
| Control Unit  | 23      | 23  |          |
| Treatment     | D       | B   | 1        |
| Circuit #     | 9       | 10  |          |
| Control Unit  | 24      | 24  |          |
| Treatment     | H       | A   | 1        |
| Circuit #     | 11      | 12  |          |
| Control Unit  | 24      | 24  |          |
| Treatment     | G       | C   | 1        |
| Circuit #     | 13      | 14  |          |
| Control Unit  | 24      | 24  |          |
| Treatment     | E       | F   | 1        |
| Circuit #     | 15      | 16  |          |
| Control Unit  | 24      | 24  |          |
| Treatment     | C       | F   | 2        |
| Circuit #     | 17      | 18  |          |
| Control Unit  | 25      | 25  |          |
| Treatment     | E       | B   | 2        |
| Circuit #     | 19      | 20  |          |
| Control Unit  | 25      | 25  |          |
| Treatment     | H       | D   | 2        |
| Circuit #     | 21      | 22  |          |
| Control Unit  | 25      | 25  |          |
| Treatment     | A       | G   | 2        |
| Circuit #     | 23      | 24  |          |
| Control Unit  | 25      | 25  |          |

| Bottom Incubator | Circuit |     | Operator |
|------------------|---------|-----|----------|
|                  | LHS     | RHS |          |
| Treatment        | G       | A   | 1        |
| Circuit #        | 25      | 26  |          |
| Control Unit     | 26      | 26  |          |
| Treatment        | D       | H   | 1        |
| Circuit #        | 27      | 28  |          |
| Control Unit     | 26      | 26  |          |
| Treatment        | B       | E   | 1        |
| Circuit #        | 29      | 30  |          |
| Control Unit     | 26      | 26  |          |
| Treatment        | F       | C   | 1        |
| Circuit #        | 31      | 32  |          |
| Control Unit     | 26      | 26  |          |
| Treatment        | F       | E   | 1        |
| Circuit #        | 33      | 34  |          |
| Control Unit     | 27      | 27  |          |
| Treatment        | C       | G   | 1        |
| Circuit #        | 35      | 36  |          |
| Control Unit     | 27      | 27  |          |
| Treatment        | A       | H   | 1        |
| Circuit #        | 37      | 38  |          |
| Control Unit     | 27      | 27  |          |
| Treatment        | B       | D   | 1        |
| Circuit #        | 39      | 40  |          |
| Control Unit     | 27      | 27  |          |
| Treatment        | H       | B   | 2        |
| Circuit #        | 41      | 42  |          |
| Control Unit     | 28      | 28  |          |
| Treatment        | E       | F   | 2        |
| Circuit #        | 43      | 44  |          |
| Control Unit     | 28      | 28  |          |
| Treatment        | D       | C   | 2        |
| Circuit #        | 45      | 46  |          |
| Control Unit     | 28      | 28  |          |
| Treatment        | G       | A   | 2        |
| Circuit #        | 47      | 48  |          |
| Control Unit     | 28      | 28  |          |
